# Supplementary material for: In-Water Antibiotic Dosing Practices on Pig Farms
Source: MDPI journal article supplement (doi:10.3390/antibiotics10020169), 2021-02-08
Supplement: s1 [file s1]

# Pig Water Medication Questionnaire

Please complete this questionnaire.

Thank you very much for taking the time to complete this questionnaire. The information you provide will be used to develop tools to help pig producers and veterinarians optimise dosing of groups of pigs on farms with antibiotics and other additives via drinking water for disease control and treatment.

This questionnaire has 4 main parts. It should take you no more than 45 minutes to complete.

As explained in the Consent Form, all the information you provide will remain confidential.

You do not have to complete the questionnaire in one session. Click the 'Save & Return Later' button on the survey page to save your progress and return where you left off to complete the survey any time in the future.

Many thanks,

Dr. Steve Little

PhD student

Faculty of Veterinary and Agricultural Sciences

The University of Melbourne

---

## 1. GENERAL INFORMATION

**Firstly, please provide some general information about you and your farm.**

|                              |                      |
|------------------------------|----------------------|
| Name:                        | <input type="text"/> |
| Mobile number:               | <input type="text"/> |
| Farm name:                   | <input type="text"/> |
| Farm road address:           | <input type="text"/> |
| Management position on farm: | <input type="text"/> |

How many years have you worked in the pig industry?

- ☐ Less than 2 years
- ☐ 2 to 5 years
- ☐ 6 to 10 years
- ☐ More than 10 years

How many years have you worked on this particular farm?

- ☐ Less than 2 years
- ☐ 2 to 5 years
- ☐ 6 to 10 years
- ☐ More than 10 years

How old are you?

- ☐ 18 to 24
- ☐ 25 to 34
- ☐ 35 to 44
- ☐ 45 to 54
- ☐ 55 to 64
- ☐ 65 or over
- ☐ Decline to answer

Farm is:

- ☐ Farrow-to-finish
- ☐ Growing pigs only

Farm production system:

- ☐ All-in-all-out by room or building
- ☐ Continuous flow
- ☐ All-in-all-out in some rooms / buildings, continuous flow in others

Pig breed:

---

Suckling pigs - current number on farm:

---

Suckling pigs - no. days in this phase:

---

Weaner pigs - current number on farm:

---

Weaner pigs - no. days in this phase:

---

Grower-finisher pigs - current number on farm:

---

Grower-finisher pigs - no. days in this phase:

---

Sows - current number on farm:

---

---

**2A. FARM'S WEANER BUILDINGS**

---

**Please select two (2) weaner buildings on the farm in which pigs are water medicated.  
If possible, select 2 buildings that are different in design to each other.**

**FIRST WEANER BUILDING:**

Building's name: \_\_\_\_\_

Building's age: ☐ Less than 2 years  
☐ 3 to 10 years  
☐ 11 to 20 years  
☐ More than 20 years

Number of rooms: \_\_\_\_\_

Number of pens per room: \_\_\_\_\_

Number of pigs per pen: \_\_\_\_\_

Approximate pen length (metres): \_\_\_\_\_

Approximate pen width (metres): \_\_\_\_\_

Number of feeders per pen: \_\_\_\_\_

Feeder type: ☐ Dry  
☐ Wet/dry

Number of drinkers per pen: \_\_\_\_\_

Drinker type (select one or more): ☐ Nipple  
☐ Bite  
☐ Bowl  
☐ Trough  
☐ Nipple + bite  
☐ Nipple + bowl  
☐ Nipple + trough  
☐ Bite + trough

Pen floor type (select one or more): ☐ Full mesh or slat  
☐ Partial mesh or slat  
☐ Solid  
☐ Straw  
☐ Other

Pigs' sex (select one or more): ☐ Boar  
☐ Gilt  
☐ Barrow

Pigs' average age at entry (days): \_\_\_\_\_

Pigs' average bodyweight at entry (kg): \_\_\_\_\_

Pigs' average age at exit (weeks): \_\_\_\_\_

Pigs' average bodyweight at exit (kg): \_\_\_\_\_

Average days each pig is in building (days): \_\_\_\_\_

All-in-all-out by room or building?

- ☐ Yes
- ☐ No

Ventilation system in building:

- ☐ Natural
- ☐ Mechanically assisted (fans)

Is the building's ceiling insulated?

- ☐ Yes
- ☐ No

Number of other weaner buildings on the farm like this one:

---

---

**SECOND WEANER BUILDING:**

---

Building's name: \_\_\_\_\_

Building's age: ☐ Less than 2 years  
☐ 3 to 10 years  
☐ 11 to 20 years  
☐ More than 20 years

Number of rooms: \_\_\_\_\_

Number of pens per room: \_\_\_\_\_

Number of pigs per pen: \_\_\_\_\_

Approximate pen length (metres): \_\_\_\_\_

Approximate pen width (metres): \_\_\_\_\_

Number of feeders per pen: \_\_\_\_\_

Feeder type: ☐ Dry  
☐ Wet/dry

Number of drinkers per pen: \_\_\_\_\_

Drinker type (select one or more): ☐ Nipple  
☐ Bite  
☐ Bowl  
☐ Trough  
☐ Nipple + bite  
☐ Nipple + bowl  
☐ Nipple + trough  
☐ Bite + trough

Pen floor type (select one or more): ☐ Full mesh or slat  
☐ Partial mesh or slat  
☐ Solid  
☐ Straw  
☐ Other

Pigs' sex (select one or more): ☐ Boar  
☐ Gilt  
☐ Barrow

Pigs' average age at entry (days): \_\_\_\_\_

Pigs' average bodyweight at entry (kg): \_\_\_\_\_

Pigs' average age at exit (weeks): \_\_\_\_\_

Pigs' average bodyweight at exit (kg): \_\_\_\_\_

Average days each pig is in building (days): \_\_\_\_\_

All-in-all-out by room or building? ☐ Yes  
☐ No

Ventilation system in building: ☐ Natural  
☐ Mechanically assisted (fans)

Is the building's ceiling insulated? ☐ Yes  
☐ No

Number of other weaner buildings on the farm like  
this one:

---

---

**2B. FARM'S GROWER/FINISHER BUILDINGS**

---

**Please select two (2) grower/finisher buildings on the farm in which pigs are water medicated.**

**If possible, select 2 buildings that are different in design to each other.**

**FIRST GROWER/FINISHER BUILDING:**

Building's name: \_\_\_\_\_

Building's age: ☐ Less than 2 years  
☐ 3 to 10 years  
☐ 11 to 20 years  
☐ More than 20 years

Number of rooms: \_\_\_\_\_

Number of pens per room: \_\_\_\_\_

Number of pigs per pen: \_\_\_\_\_

Approximate pen length (metres): \_\_\_\_\_

Approximate pen width (metres): \_\_\_\_\_

Number of feeders per pen: \_\_\_\_\_

Feeder type: ☐ Dry  
☐ Wet/dry

Number of drinkers per pen: \_\_\_\_\_

Drinker type (select one or more): ☐ Nipple  
☐ Bite  
☐ Bowl  
☐ Trough  
☐ Nipple + bite  
☐ Nipple + bowl  
☐ Nipple + trough  
☐ Bite + trough

Pen floor type (select one or more): ☐ Full mesh or slat  
☐ Partial mesh or slat  
☐ Solid  
☐ Straw  
☐ Other

Pigs' sex (select one or more): ☐ Boar  
☐ Gilt  
☐ Barrow

Pigs' average age at entry (weeks): \_\_\_\_\_

Pigs' average bodyweight at entry (kg): \_\_\_\_\_

Pigs' average age at exit (weeks): \_\_\_\_\_

Pigs' average bodyweight at exit (kg): \_\_\_\_\_

Average days each pig is in building (days):

---

All-in-all-out by room or building?

- ☐ Yes  
☐ No

Ventilation system in building:

- ☐ Natural  
☐ Mechanically assisted (fans)

Is the building's ceiling insulated?

- ☐ Yes  
☐ No

Number of other grower/finisher buildings on the farm like this one:

---



---

**SECOND GROWER/FINISHER BUILDING:**

---

Building's name: \_\_\_\_\_

Building's age: ☐ Less than 2 years  
☐ 3 to 10 years  
☐ 11 to 20 years  
☐ More than 20 years

Number of rooms: \_\_\_\_\_

Number of pens per room: \_\_\_\_\_

Number of pigs per pen: \_\_\_\_\_

Approximate pen length (metres): \_\_\_\_\_

Approximate pen width (metres): \_\_\_\_\_

Number of feeders per pen: \_\_\_\_\_

Feeder type: ☐ Dry  
☐ Wet/dry

Number of drinkers per pen: \_\_\_\_\_

Drinker type (select one or more): ☐ Nipple  
☐ Bite  
☐ Bowl  
☐ Trough  
☐ Nipple + bite  
☐ Nipple + bowl  
☐ Nipple + trough  
☐ Bite + trough

Pen floor type (select one or more): ☐ Full mesh or slat  
☐ Partial mesh or slat  
☐ Solid  
☐ Straw  
☐ Other

Pigs' sex (select one or more): ☐ Boar  
☐ Gilt  
☐ Barrow

Pigs' average age at entry (weeks): \_\_\_\_\_

Pigs' average bodyweight at entry (kg): \_\_\_\_\_

Pigs' average age at exit (weeks): \_\_\_\_\_

Pigs' average bodyweight at exit (kg): \_\_\_\_\_

Average days each pig is in building (days): \_\_\_\_\_

All-in-all-out by room or building? ☐ Yes  
☐ No

Ventilation system in building: ☐ Natural  
☐ Mechanically assisted (fans)

Is the building's ceiling insulated? ☐ Yes  
☐ No

Number of other grower/finisher buildings on the farm  
like this one:

---

---

**3. FARM'S DRINKING WATER SUPPLY SYSTEM**

---

What is the main water source the farm has used over the past 12 months?

- ☐ Town supply
- ☐ Bore
- ☐ River, lake or irrigation channel
- ☐ Farm dam
- ☐ Bore + town supply (shandy)
- ☐ Bore + river, lake or irrigation channel (shandy)
- ☐ Bore + farm dam (shandy)

What other water source(s) has the farm used over the past 12 months?

- ☐ Town supply
- ☐ Bore
- ☐ River, lake or irrigation channel
- ☐ Farm dam
- ☐ Bore + town supply (shandy)
- ☐ Bore + river, lake or irrigation channel (shandy)
- ☐ Bore + farm dam (shandy)

What water storage facilities are on the farm?

- ☐ None
- ☐ Dam
- ☐ Primary tank(s) (covered to prevent contamination)
- ☐ Primary tank(s) (uncovered)
- ☐ Header tank(s) on buildings (covered to prevent contamination)
- ☐ Header tank(s) on buildings (uncovered)
- ☐ Other

You selected Other. Please describe water storage facility.

---

How is water delivered to buildings on the farm?

- ☐ Gravity
- ☐ Pump(s)
- ☐ Mains pressure
- ☐ Other

You selected Other. Please describe how water is delivered to buildings.

---

---

**EXTERNAL main water supply line from source to buildings on the farm**

---

Straight main pipe with branches to each  
building

Looped main pipe around buildings

To weaner buildings

☐☐

To grower/finisher buildings

☐☐

---

**INTERNAL water supply line in buildings on the farm**

---

Straight main pipe with lateral branches to  
rows of pens

Looped main pipe around rows of pens

In weaner buildings

☐☐

In grower/finisher buildings

☐☐

---

**Water pipe materials**

---

|                                             | White Poly               | Black PVC                | Metal                    | Concrete                 | Other                    |
|---------------------------------------------|--------------------------|--------------------------|--------------------------|--------------------------|--------------------------|
| External pipes to weaner buildings          | <input type="checkbox"/> |
| External pipes to grower/finisher buildings | <input type="checkbox"/> |
| Internal pipes in weaner buildings          | <input type="checkbox"/> |
| Internal pipes in grower/finisher buildings | <input type="checkbox"/> |

---

**Water flow rates from pen drinkers:**

Are there any concerns about the water flow rates from pen drinkers to pigs in any buildings on the farm? e.g. flow rates too low, too high, too inconsistent

- ☐ Yes  
☐ No

You selected Yes. Please describe concerns.

\_\_\_\_\_

How often are the water flow rates from pen drinkers in the buildings you described in section 2 checked?

- ☐ Daily  
☐ Weekly  
☐ Monthly  
☐ Quarterly  
☐ 6 monthly  
☐ Yearly  
☐ Sporadically  
☐ Never

What method is used to check water flow rate from pen drinkers?

- ☐ Visual assessment only  
☐ Use finger to assess strength of flow from drinker  
☐ Use a graduated measuring jug and timer to measure flow rate in mls/minute  
☐ Other

What time of day are the checks usually done?

- ☐ 12am to 6am  
☐ 6am to 12pm  
☐ 12pm to 6pm  
☐ 6pm to 12am

How many drinkers in each building are checked each time?

- ☐ All  
☐ Many  
☐ Some

Have you measured drinker flow rates inside any of the buildings you described in section 2?

- ☐ Yes  
☐ No

FIRST weaner building:

Flow rate - Average (mls/minute)

\_\_\_\_\_

Flow rate - Minimum (mls/minute)

\_\_\_\_\_

Flow rate - Maximum (mls/minute)

\_\_\_\_\_

SECOND weaner building:

Flow rate - Average (mls/minute)

\_\_\_\_\_

Flow rate - Minimum (mls/minute)

\_\_\_\_\_

Flow rate - Maximum (mls/minute)

\_\_\_\_\_

FIRST grower/finisher building:

Flow rate - Average (mls/minute)

\_\_\_\_\_

Flow rate - Minimum (mls/minute)

\_\_\_\_\_

Flow rate - Maximum (mls/minute)

\_\_\_\_\_

SECOND grower/finisher building:

Flow rate - Average (mls/minute)

---

Flow rate - Minimum (mls/minute)

---

Flow rate - Maximum (mls/minute)

---



---

**Water line cleaning and maintenance:**

---

How often is the complete water line (including header tanks, pipes and drinkers) flushed and cleaned/sanitised?

- ☐ Daily
- ☐ Weekly
- ☐ Monthly
- ☐ Quarterly
- ☐ 6 monthly
- ☐ Yearly
- ☐ Between each batch of pigs
- ☐ Sporadically
- ☐ Never

Please describe the method / materials / chemicals used.

Are drinkers thoroughly cleaned/sanitised between each batch of pigs?

- ☐ Yes
- ☐ No

Please describe routine repairs and maintenance done to water line, including header tanks, pipes and drinkers (what is done and when).

---

**Water quality:**

Are there any concerns about the quality of water supplied to pigs on the farm? e.g. its physical appearance, chemical and mineral composition, or microbial contamination

- ☐ Yes  
☐ No

You selected Yes. Please describe concerns.

---

How often is a sample of the farm's drinking water collected and quality tested at a laboratory?

- ☐ Every 6 months  
☐ Every year  
☐ Every 2 years  
☐ Sporadically  
☐ Never

Do you have a copy of the most recent water test report?

- ☐ Yes  
☐ No

Are you willing to share this water test report to assist this research project?  
(It would remain confidential)

- ☐ Yes  
☐ No

Is the farm's drinking water routinely treated in any way to improve its quality?

- ☐ Yes  
☐ No

How is the water treated?

- ☐ Activated carbon filtration  
☐ Reverse osmosis (RO)  
☐ Ion exchange water softening  
☐ Sediment filtration  
☐ Distillation  
☐ Aeration  
☐ De-aeration  
☐ Continuous chlorination  
☐ Ultraviolet radiation (UV)  
☐ Ozonation  
☐ Ultra, micro and nano filtration  
☐ Other

You selected Other. Please specify.

---

---

**4. FARM'S WATER MEDICATION DOSING SYSTEM AND PROGRAM**

---

How many years has your farm been water medicating pigs?

- ☐ Less than 2 years
- ☐ 2 to 5 years
- ☐ 6 to 10 years
- ☐ 11 to 20 years
- ☐ More than 20 years

---

**Type of dosing equipment serving each of the buildings you described in section 2.**


---

|                                                                               | Header tank for batch mixing | Water powered proportional dosing pump e.g. Gator, Dosatron | Electric powered, computer controlled dosing pump e.g. Select |
|-------------------------------------------------------------------------------|------------------------------|-------------------------------------------------------------|---------------------------------------------------------------|
| First weaner building                                                         | <input type="checkbox"/>     | <input type="checkbox"/>                                    | <input type="checkbox"/>                                      |
| Second weaner building                                                        | <input type="checkbox"/>     | <input type="checkbox"/>                                    | <input type="checkbox"/>                                      |
| First grower/finisher building                                                | <input type="checkbox"/>     | <input type="checkbox"/>                                    | <input type="checkbox"/>                                      |
| Second grower/finisher building                                               | <input type="checkbox"/>     | <input type="checkbox"/>                                    | <input type="checkbox"/>                                      |
| Does each pump serve more than one building?                                  |                              | <input type="radio"/> Yes<br><input type="radio"/> No       |                                                               |
| Does each pump have bypass valves to isolate it when not in use?              |                              | <input type="radio"/> Yes<br><input type="radio"/> No       |                                                               |
| Does each pump have a filter upstream to trap sediment?                       |                              | <input type="radio"/> Yes<br><input type="radio"/> No       |                                                               |
| Does each pump have a water flow meter?                                       |                              | <input type="radio"/> Yes<br><input type="radio"/> No       |                                                               |
| Does each pump have a pressure reducer to protect it against pressure surges? |                              | <input type="radio"/> Yes<br><input type="radio"/> No       |                                                               |

---

**In each of the buildings you described in section 2:**

---

Water medication is administered to pigs in  
ALL pens within building

Water medication can be administered to  
pigs in selected pens within building

First weaner building ☐

Second weaner building ☐

First grower/finisher building ☐

Second grower/finisher building ☐

☐

☐

☐

☐

What is the SHORTEST distance between a dosing pump  
and a weaner building on the farm? (metres):

---

What is the LONGEST distance between a dosing pump  
and a weaner building on the farm? (metres):

---

What is the SHORTEST distance between a dosing pump  
and a grower/finisher building on the farm?  
(metres):

---

What is the LONGEST distance between a dosing pump  
and a grower/finisher building on the farm?  
(metres):

---

---

**Route by which medications are administered to pigs in the buildings you described in section 2:**

|                                            | In-water                 | In-feed                  | By injection             |
|--------------------------------------------|--------------------------|--------------------------|--------------------------|
| First and second weaner buildings          | <input type="checkbox"/> | <input type="checkbox"/> | <input type="checkbox"/> |
| First and second grower/finisher buildings | <input type="checkbox"/> | <input type="checkbox"/> | <input type="checkbox"/> |

Please list water medications (brand name or active) administered to pigs in the first and second weaner buildings:

---

Please list water medications (brand name or active) administered to pigs in the first and second grower/finisher buildings:

---

Thank you very much for completing the questionnaire.
