# Supplementary material for: In-Water Antibiotic Dosing Practices on Pig Farms
Source: MDPI journal article supplement (doi:10.3390/antibiotics10020169), 2021-02-08
Supplement: s1 [file s1]

**Summary table:**  
**Specific in-water antibiotic dosing practices, their consequences and the expected impact on pigs' systemic exposure to an antibiotic administered through their drinking water**

| <b>In-water dosing practice</b>                                                                                                                                                                                                                                         | <b>Consequences and expected impact on pigs' systemic exposure to antibiotic</b>                                                                                                                                                                                                                      |
|-------------------------------------------------------------------------------------------------------------------------------------------------------------------------------------------------------------------------------------------------------------------------|-------------------------------------------------------------------------------------------------------------------------------------------------------------------------------------------------------------------------------------------------------------------------------------------------------|
| Header tanks are used to dose pigs with each tank's inlet valve deliberately left open so tank continuously refills with unmedicated water                                                                                                                              | Concentration of antibiotic in water flowing from tank along water line to pigs is progressively reduced over time. Pharmacokinetic /pharmacodynamic (PK/PD) index attained by pigs may not be high. Many / all pigs are under-dosed                                                                  |
| Very highly concentrated dosing pump stock solution is prepared of an antibiotic product with low solubility such as amoxicillin trihydrate, trimethoprim-sulphadiazine, chlortetracycline hydrochloride, for use with a short dosing period and/or low injection ratio | Many undissolved antibiotic particles are present which are drawn up by the pump and injected into water line, especially early in the dosing event. Many / all pigs do not ingest sufficient antibiotic, and antibiotic absorption and distribution in pigs is also compromised i.e. are under-dosed |
| Dosing pump is located in central position on farm, requiring medicated water to travel long distances to pig building                                                                                                                                                  | Antibiotic is prone to degradation if exposed to external factors that adversely affect its stability e.g. water quality parameters, water pipe materials. If so, many / all pigs do not ingest sufficient active antibiotic i.e. are under-dosed                                                     |
| Preventative maintenance is not done on dosing pump. Pump performs poorly or fails during dosing event and this is not detected and rectified by farm staff for some hours                                                                                              | Concentration of antibiotic in water line fluctuates over time or falls abruptly to nil. Many / all pigs do not ingest sufficient antibiotic i.e. are under-dosed                                                                                                                                     |
| An assumed water wastage value is used in dosing calculations which is an under-estimate of pigs' actual water wastage rate                                                                                                                                             | Many / all pigs do not ingest sufficient antibiotic i.e. are under-dosed                                                                                                                                                                                                                              |
| An assumed water wastage value is used in dosing calculations which is an over-estimate of pigs' actual water wastage rate                                                                                                                                              | Many / all pigs ingest excessive antibiotic i.e. are over-dosed                                                                                                                                                                                                                                       |
| Dosing event commencement time is chosen without using measured data on pigs' daily water usage pattern. Dosing event is commenced during a period of low water consumption by pigs                                                                                     | Ingestion of antibiotic in first few hours is low. Plasma concentration of antibiotic in pigs therefore rises slowly and the PK/PD index attained by pigs may not be high. Many / all pigs are under-dosed                                                                                            |

For further information on sources of between-animal variability in systemic exposure to an antibiotic when water medicating pigs, please refer to:  
Little, S.B., Crabb, H.K., Woodward, A.P., Browning, G.F. and Billman-Jacobe, H. Review: Water medication of growing pigs: sources of between-animal variability in systemic exposure to antimicrobials. *Animal* 2019, 13(12), 3031-3040. <http://doi.org/10.1017/S1751731119001903>
