# Supplementary material for: In-Water Antibiotic Dosing Practices on Pig Farms
Source: MDPI journal article supplement (doi:10.3390/antibiotics10020169), 2021-02-08
Supplement: s1 [file s1]

**Final coding framework (NVivo™)**

Infrastructure

- Water sources
- On-farm water storages
- Pipelines and fittings
- Drinking appliances in pens
- Strategies used to improve [changes]

---

Water supply and usage by pigs

- Day's usage in on-farm storage
- Pigs' daily water demand
- Peak demand periods each day
- Water wastage by pigs
- Water quality
- Hygiene management
- Problems encountered with water system and dosing equipment

---

Antibiotic administration to pigs

- Dosing equipment
- Vet scripts and dosage calculations
- Timing and duration of dosing events
  - Outbreaks vs. metaphylaxis
- Antibiotics and other products administered
  - In-water vs. in-feed
- Problems / preferences
- Effectiveness of dosing events
  - Factors contributing to variability in antibiotic exposure among pigs in a group
- Strategies used to improve [changes]
